# Supplementary material for: Associations of cannabis use disorder with cognition, brain structure, and brain function in African Americans
Source: PubMed Central journal article supplement (PMC7978126; doi:10.1002/hbm.25324), 2020-12-19
Supplement: HBM-42-1727-s001.pdf [file HBM-42-1727-s001.pdf]

## SUPPORTING INFORMATION

to

Koenis et al., Associations of cannabis use disorder with cognition, brain structure, and brain function in African Americans

### Table of Contents

#### Supplemental Material and Methods

|                                          |   |
|------------------------------------------|---|
| Participants.....                        | 2 |
| Cognition .....                          | 2 |
| Preprocessing of resting state data..... | 2 |
| Network-based statistic.....             | 3 |
| Graph theory .....                       | 3 |

#### Bayes Factors

|                                            |   |
|--------------------------------------------|---|
| Null interval .....                        | 4 |
| Posterior probability of association ..... | 4 |

#### Supplemental Results

|                                                                     |   |
|---------------------------------------------------------------------|---|
| Correlation with duration of cannabis use and age of first age..... | 4 |
| Correlation between cognition and brain outcomes .....              | 5 |
| FC results on non-GSR data .....                                    | 5 |

|                  |   |
|------------------|---|
| References ..... | 5 |
|------------------|---|

#### Tables

##### Table S1

|                                                                                                          |    |
|----------------------------------------------------------------------------------------------------------|----|
| S1a. Subjects included in neurocognitive analyses.....                                                   | 7  |
| S1b. Subjects included in morphometry analyses .....                                                     | 8  |
| S1c. Subjects included in diffusion imaging analyses .....                                               | 9  |
| S1d. Subjects included in resting state analyses.....                                                    | 10 |
| Table S2. Regional cortical thickness (mean (SD)).....                                                   | 11 |
| Table S3. Regional cortical surface area and subcortical volumes (mean (SD)).....                        | 12 |
| Table S4. Mean (SD) FA of the skeleton and JHU white matter tracts.....                                  | 14 |
| Table S5. Marginally significant results in regional graph theory metrics (at $p < 0.005$ ).....         | 15 |
| Table S6. Marginally significant results in regional graph theory metrics of non-GSR (at $p < 0.005$ ).. | 16 |
| Table S7. Results GSR graph metrics with same density as non-GSR results.....                            | 17 |

#### Figures

|                                                                                                                  |    |
|------------------------------------------------------------------------------------------------------------------|----|
| Figure S1. Overview of the number of participants per modality and reasons for exclusion.....                    | 18 |
| Figure S2. Correlations between all cognitive measures. ....                                                     | 19 |
| Figure S3. Output of all NBS networks over thresholds $F \geq 12$ to $F \geq 16$ .....                           | 20 |
| Figure S4. Visualisation of the FDR significant edges .....                                                      | 21 |
| Figure S5. The relation between the prior probability, the Bayes factor (BF) and the posterior probability ..... | 22 |

## Supplemental Material and Methods

### *Participants*

DSM-IV diagnoses were determined through structured clinical interviews and a consensus process. The process was as follows: research assistants at (minimally) BA level who were trained in diagnostic interviews conducted the SCID and wrote a report. At weekly case conferences, diagnostic experts read the report and the group as a whole agreed upon the diagnosis.

We did not screen for alcohol or psychedelics like LSD and psilocybin. However, only one participant had a diagnosis of substance use disorder for a drug for which we didn't screen (LSD, full sustained remission) and visibly intoxicated participants or participants who mentioned they had a drink before coming in for the research study (as part of the health questionnaire) were excluded. It is therefore unlikely that our results are impacted by participants who had traces of drugs (other than cannabis) in their system.

Years of education were approximated as an ordinal variable as follows: 1) grade 6 or less; 2) grade 7-12 without graduation; 3) high school/GED graduate; 4) part college; 5) 2-yr college/trade school graduate; 6) 4-yr college graduate; 7) part graduate school or professional school; 8) complete graduate or professional school.

### *Cognition*

General intellectual functioning  $g$  was defined as the first principle component from a PCA analyses done in R with `prcomp`. To avoid missing data for  $g$  (because  $g$  cannot be estimated for participants with missing data on one or more cognitive tests), missing data on any cognitive test was imputed with the median of available data before the computation of  $g$  with a PCA. The estimate of  $g$  did not change when using available data or imputed data: % of variance explained (38%) and correlation with WASI IQ ( $r=0.64$ ) were the same when imputed missing data or using available data. After PCA, imputed data was reset to NA. Subjects who scored  $<70$  for WASI IQ (but  $>70$  for WTAR IQ) were excluded from cognitive analyses ( $n=5$  non-CUD, 1 CUD). Eight subjects did not have cognitive data. Final group sizes were 142 non-CUD, 53 CUD (see also Figure S1).

Post hoc, a multiple regression was done to account for the interdependency of the cognitive tasks. This was done in R with `glm`, with a binomial family, including all variables but  $g$  (because  $g$  is computed based on all variables and is thus highly colinear with all variables): `glm(cannabis state ~ var1 + var2 + var3 + ... + var 20, family=binomial)`.

### *Preprocessing of resting state data*

Resting state fMRI data were preprocessed using a pipeline developed at Washington University (Glasser et al., 2013). Preprocessing included distortion removal, motion estimation, cross-modal registration and alignment to standard space. Consequently, for all sessions, the first 10 timepoints were discarded to allow for magnetization stabilization. The data were despiked using AFNI's `3dDespike` (Jo et al., 2013). Motion was regressed from the signal using the movement regressors, including location estimates and their derivatives DVARS (Power et al., 2012) and framewise displacement (FD). The motion regression was done using FSL (Smith et al., 2004), and also included variance normalization and demeaning. Global signal regression (GSR, based on all voxels) was applied to remove remaining nuisance signals. In the remaining signal, `compcor` (Behzadi et al., 2007) was applied to identify high variance voxels and regress their

average signal from the signal using Nilearn (Abraham et al., 2014). Bandpass filtering was applied (0.01 - 0.125 Hz). Lastly, frame censoring was applied to frames with FD > 0.5mm, as well as to uncensored segments of data with less than 5 contiguous volumes.

After the data cleaning procedure, average time series were extracted for 382 predefined regions of interest using the Harvard Oxford subcortical atlas for subcortical regions (Desikan et al., 2006), the MNI-FNIrt atlas for the cerebellum (Diedrichsen et al., 2009), and the Gordon atlas for the cortex (Gordon et al., 2016). From the time series, a parcel by parcel correlation matrix was generated using Pearson's correlation. Lastly, we applied a Fisher's  $r$  to  $Z$  transformation.

### *Network Based Statistic*

The network-based statistic (Zalesky et al., 2010) procedure includes the following steps:

- 1) Identify edges that show a group difference in connectivity strength. Group differences in connectivity strength were determined over each edge with a two-sided F-test. We first tested over a large range of thresholds to get a sense of the sensitivity to the thresholds: from  $F \geq 4$  (which corresponds to  $p < 0.047$ , uncorrected) to  $F \geq 17$  ( $p < 0.000063$ ), in steps of 1. Then, for interpretability we included ranges that resulted in the largest component having more than 2 but less than 75 edges (regardless of significance of the components), resulting in  $F \geq 12-16$ . These thresholds signify strong edge-differences ( $p < 0.0007$ ) between the groups while having meaningful component sizes.
- 2) From the resulting adjacency matrix, identify all distinct components (subgraphs with at least one path between every node);
- 3) Rank components in terms of their size, either based on i) number of edges (extent) or ii) sum of F-statistics of all edges (intensity);
- 4) The size of each component is the test statistic, with a null-distribution generated from the size of the largest component from each of 5000 permutations of group membership. Note that this test has a family wise error correction for multiple comparisons. We also tested for significant differences in the adjacency matrix with FDR correction in the NBS toolbox (50000 permutations,  $q < 0.05$ ).

### *Graph theory*

The following graph-theoretical metrics were estimated:

- 1) metrics of global connectivity: global efficiency, a measurement of network integration; and clustering coefficient, a measurement of global segregation
- 2) metrics of regional connectivity: degree, the number of edges connected to the node; strength, the sum of weights of edges connected to the node; and participation coefficient, the extent to which a given node connects to nodes in modules other than its own
- 3) metrics of modular organization: modularity, the proportion of intra-modular edges over all modules in the network; and community structure, the assignment of regional nodes to specific modules. Differences in community structure were tested with normalized mutual information (partition-distance in BCT).

## **Bayes Factors**

### *Null interval*

A standard null hypothesis used in many statistical tests is that the difference between groups is zero. However, even in the absence of a true effect, the difference between two groups will never be exactly zero. Therefore, it is more appropriate to test against a null-interval (Morey and Rouder, 2011). The null-interval includes non-zero effects that are too small to be of interest. To be able to pick up small deviations from the null, we choose a null-interval of (-0.1, 0.1), where 0.1 is the standardized difference between the groups (i.e. effect size).

### *Posterior probability*

Multiple testing correction was done as discussed by Stephens & Balding (Stephens and Balding, 2009). The basis of the method is the *a priori* estimate (i.e., the prior probability  $\pi$ ) of the proportion of tests that are truly associated with CUD. With the prior we can compute the posterior odds as  $PO = BF * (\pi / 1 - \pi)$  and the posterior probability of association as  $PPA = PO / (1+PO)$  (Stephens and Balding, 2009). The PPA can be interpreted directly as a probability of a true effect, irrespective of power, sample size or how many tests were done (Stephens and Balding, 2009). See Figure S5 for a visualization of the relation between BF, prior  $\pi$  and the PPA. From these formulas, we can infer that with a default prior  $\pi = 0.5$ ,  $BF = 3$  gives  $PPA = 0.75$ , and  $BF = 0.33$  gives  $PPA = 0.25$ . Because  $BF > 3$  is considered substantial, and  $BF > 10$  is strong evidence for the alternative (Jeffreys, 1961), we use  $PPA > 0.75$  as substantial evidence, and  $PPA > 0.90$  for strong evidence for a true effect.  $PPA < 0.25$  and  $0.10$  are substantial and strong evidence for the null hypothesis respectively.

For the graph metrics, this results in the following. Because we use the BF to provide additional information on the model evidence and not as a first method of choice, we assumed the probability to be the number of regions found with the  $p < 0.005$  threshold. With  $\pi = 4 / (8*382) = 0.0013$ , PPA for all graph metrics is  $< 0.01$ , which is strong evidence for a null finding. When we increase  $\pi$  to 0.01, PPA remains low ( $PPA < 0.14$ ). Substantial evidence for a real result ( $PPA > 0.75$ ) would require  $BF > 2300$  with  $\pi = 0.0013$ , or  $BF = 15$  with  $\pi = 0.165$ . A  $\pi = 0.165$  represents an unrealistic expectation to find more than 63 significant regions per graph metric.

Similarly, for the edge-wise significance only the BF for the insula-SPG gives a high PPA of 0.99 when we assume a (high) prior of 0.001 (that is, 73 significant edges out of the  $(381*382)/2=72771$  edges). The prior of 0.0001 based on the data gives  $PPA = 0.95$ . Evidence of an association between CUD and functional connectivity (FC) for the other edges ranges from inconclusive ( $PPA < 0.42$  with a high prior) to strong evidence for the null ( $PPA < 0.07$  with the low data-driven prior). Note that we did not compute BF for NBS-networks as a whole.

We conclude that there is strong evidence for the *absence* of an association between CUD and resting state graph metrics. There is strong evidence for lower FC between the right insula and right superior parietal gyrus in CUD group.

## **Supplemental Results**

### *Correlation with duration of cannabis use and age of first use*

None of the cognitive tests correlated with duration of use (all  $r < 0.14$ ,  $p > 0.33$ , uncorrected) or age of first use ( $r < 0.19$ ,  $p > 0.19$ ). FC of the NBS and FDR edges did not correlate with duration of use ( $r < |0.31|$ ,  $p > 0.05$ ) or age of onset ( $r < |0.24|$ ,  $p > 0.14$ ). BF for all correlations was inconclusive ( $0.2 > BF < 1.8$ ).

### *Correlation between significant cognition and brain variables*

Correlation between cognition and FC of significant edges was found at  $p < 0.005$  for CVLT sum correct with two edges: right SPG to right insula ( $r = 0.28$ ,  $p = 0.002$ ,  $BF = 8.5$ ), and left accumbens to right hippocampus ( $r = -0.28$ ,  $p = 0.001$ ,  $BF = 9.8$ ). The correlations are in the opposite direction of the association of CUD with FC. None of the findings survived FDR correction. Although  $BF > 3$  suggests substantial evidence for a true correlation, the PPA is only 0.15 for  $BF = 9.8$  when considering the multiple tests and a prior probability of  $2 / (7 * 16) = 0.018$ . Thus, these findings are inconclusive at best.

### *FC results on non-GSR data*

None of the correlations between resting state modules reached FDR significance. Two out of 120 correlations were significant at  $p < 0.005$ : mean between-network-FC of positive edges was stronger in the CUD group between the cingulo-parietal and somatomotor area of the mouth ( $p = 0.0024$ , Cohen's  $d = 0.60$ ,  $BF = 13.4$ ), and between the cingulo-parietal and auditory resting state network ( $p = 0.0042$ , Cohen's  $d = 0.56$ ,  $BF = 7.5$ ). Using this as a prior gives  $\pi = 0.017$ , with  $PPA = 0.19$  and  $0.11$ , thus, support for the absence of a group difference. A more lenient prior of  $\pi = 0.125$  results in inconclusive  $PPA = 0.66$  and  $0.52$ . Mean within and outward strength for each of the 15 resting state modules was inconclusive with a lenient  $\pi = 0.33$ ,  $BF < 3.74$ ,  $PPA < 0.65$ .

For the graph metrics, we used a data driven prior based on the number of results that were significant at  $p < 0.005$ : with  $\pi = 28 / (8 * 382) = 0.0092$ , 24 of the variables have  $PPA < 0.20$ , suggesting evidence for the absence of an effect. Four variables had a  $BF > 40$ , with an inconclusive  $PPA < 0.33$ , see Table S6. For the GSR-results with the same density as the non-GSR (Table S7),  $\pi = 13 / (8 * 382) = 0.0043$ , resulting in  $PPA < 0.08$ , suggesting strong evidence for the absence of an effect.

## References

- Abraham, A., Pedregosa, F., Eickenberg, M., Gervais, P., Mueller, A., Kossaifi, J., Gramfort, A., Thirion, B., Varoquaux, G., 2014. Machine learning for neuroimaging with scikit-learn. *Front. Neuroinform.* 8, 14. <https://doi.org/10.3389/fninf.2014.00014>
- Behzadi, Y., Restom, K., Liu, J., Liu, T.T., 2007. A component based noise correction method (CompCor) for BOLD and perfusion based fMRI. *Neuroimage* 37, 90–101. <https://doi.org/10.1016/j.neuroimage.2007.04.042>
- Desikan, R.S., Ségonne, F., Fischl, B., Quinn, B.T., Dickerson, B.C., Blacker, D., Buckner, R.L., Dale, A.M., Maguire, R.P., Hyman, B.T., Albert, M.S., Killiany, R.J., 2006. An automated labeling system for subdividing the human cerebral cortex on MRI scans into gyral based regions of interest. *Neuroimage* 31, 968–80. <https://doi.org/10.1016/j.neuroimage.2006.01.021>
- Diedrichsen, J., Balsters, J.H., Flavell, J., Cussans, E., Ramnani, N., 2009. A probabilistic MR atlas of the human cerebellum. *Neuroimage* 46, 39–46. <https://doi.org/10.1016/j.neuroimage.2009.01.045>
- Glasser, M.F., Sotiropoulos, S.N., Wilson, J.A., Coalson, T.S., Fischl, B., Andersson, J.L., Xu, J., Jbabdi, S., Webster, M., Polimeni, J.R., Van Essen, D.C., Jenkinson, M., 2013. The minimal preprocessing pipelines for the Human Connectome Project. *Neuroimage* 80, 105–124. <https://doi.org/10.1016/j.neuroimage.2013.04.127>
- Gordon, E.M., Laumann, T.O., Adeyemo, B., Huckins, J.F., Kelley, W.M., Petersen, S.E., 2016. Generation and Evaluation of a Cortical Area Parcellation from Resting-State Correlations. *Cereb. Cortex* 26, 288–303. <https://doi.org/10.1093/cercor/bhu239>
- Jeffreys, H., 1961. *Theory of Probability*, 3rd ed. Oxford University Press, Oxford.
- Jo, H.J., Gotts, S.J., Reynolds, R.C., Bandettini, P.A., Martin, A., Cox, R.W., Saad, Z.S., 2013. Effective Preprocessing Procedures Virtually Eliminate Distance-Dependent Motion Artifacts in Resting State FMRI. *J. Appl. Math.* 2013. <https://doi.org/10.1155/2013/935154>
- Morey, R.D., Rouder, J.N., 2011. Bayes factor approaches for testing interval null hypotheses. *Psychol. Methods* 16,

406–19. <https://doi.org/10.1037/a0024377>

- Power, J.D., Barnes, K.A., Snyder, A.Z., Schlaggar, B.L., Petersen, S.E., 2012. Spurious but systematic correlations in functional connectivity MRI networks arise from subject motion. *Neuroimage* 59, 2142–2154. <https://doi.org/10.1016/j.NEUROIMAGE.2011.10.018>
- Smith, S.M., Jenkinson, M., Woolrich, M.W., Beckmann, C.F., Behrens, T.E.J., Johansen-Berg, H., Bannister, P.R., De Luca, M., Drobnjak, I., Flitney, D.E., Niazy, R.K., Saunders, J., Vickers, J., Zhang, Y., De Stefano, N., Brady, J.M., Matthews, P.M., 2004. Advances in functional and structural MR image analysis and implementation as FSL. *Neuroimage* 23 Suppl 1, S208-19. <https://doi.org/10.1016/j.neuroimage.2004.07.051>
- Stephens, M., Balding, D.J., 2009. Bayesian statistical methods for genetic association studies. *Nat. Rev. Genet.* 10, 681–690. <https://doi.org/10.1038/nrg2615>
- Xia, M., Wang, J., He, Y., 2013. BrainNet Viewer: a network visualization tool for human brain connectomics. *PLoS One* 8, e68910. <https://doi.org/10.1371/journal.pone.0068910>
- Zalesky, A., Fornito, A., Bullmore, E.T., 2010. Network-based statistic: Identifying differences in brain networks. *Neuroimage* 53, 1197–1207. <https://doi.org/10.1016/j.neuroimage.2010.06.041>

**Table S1a.** Subjects included in neurocognitive analyses

|                                                      | non-CUD     | CUD         | <i>p</i>             |
|------------------------------------------------------|-------------|-------------|----------------------|
| N                                                    | 142         | 53          |                      |
| Male, n (%)                                          | 60 (42%)    | 28 (53%)    | 0.199 <sup>3</sup>   |
| Age (range)                                          | 40 (18-70)  | 37 (19-69)  | 0.198 <sup>4</sup>   |
| Duration of CB use, mean (range in yrs) <sup>1</sup> | -           | 11 (1-40)   |                      |
| Education, median (range)                            | 4 (2-8)     | 3 (2-6)     | <0.001 <sup>5</sup>  |
| On social disability, n (%) <sup>1</sup>             | 16 (11.3%)  | 2 (3.8%)    | 0.163 <sup>3</sup>   |
| Axis I Psychiatric Diagnoses, n (%)                  |             |             |                      |
| No diagnosis                                         | 92 (64.79%) | -           |                      |
| Depression                                           | 13 (9.15%)  | 8 (15.09%)  | 0.298 <sup>3</sup>   |
| PTSD                                                 | 12 (8.45%)  | 3 (5.66%)   | 0.763 <sup>3</sup>   |
| Anxiety disorders                                    | 5 (3.52%)   | 4 (7.55%)   | 0.258 <sup>3</sup>   |
| ADHD                                                 | 0 (0%)      | 1 (1.89%)   | 0.272 <sup>3</sup>   |
| Alcohol abuse/dependence                             | 28 (19.72%) | 20 (37.74%) | 0.014 <sup>3</sup>   |
| Drug other than CB abuse/dependence                  | 14 (9.86%)  | 19 (35.85%) | 0.026 <sup>3</sup>   |
| Medication, n (%) <sup>2</sup>                       |             |             |                      |
| Anxiolytic                                           | 3 (2.07%)   | 0 (0%)      | 0.564 <sup>3</sup>   |
| Antidepressant                                       | 5 (3.45%)   | 2 (3.77%)   | 1 <sup>3</sup>       |
| Atypical antipsychotic <sup>2</sup>                  | 2 (1.38%)   | 0 (0%)      | 1 <sup>3</sup>       |
| Anticonvulsant <sup>2</sup>                          | 2 (1.38%)   | 0 (0%)      | 1 <sup>3</sup>       |
| Alcohol & Nicotine                                   |             |             |                      |
| Nr drinks per month, mean (sd)                       | 9 (19)      | 13 (16)     | 0.001 <sup>4</sup>   |
| Currently smoking, n (%)                             | 43 (30.28)  | 38 (71.70)  | < 0.001 <sup>3</sup> |
| FTND, median (range) <sup>1</sup>                    | 0 (0-9)     | 3 (0-9)     | < 0.001 <sup>5</sup> |

Diagnoses are lifetime diagnoses. CB= cannabis; FTND= Fagerström test for nicotine dependence (ranges from 0 to 12).

<sup>1</sup> missing data for cannabis duration (n=2); social security (n=6 non-CUD; 2 CUD); FTND (n=36, equal percentage in the non-CUD & CUD group)

<sup>2</sup> None of the participants used mood stabilizers or lithium. Atypical antipsychotic medication was used for treatment of MDD; Anticonvulsant was used for nerve pain.

<sup>3</sup> Fisher's exact test

<sup>4</sup> Welch's *t* test

<sup>5</sup> Wilcoxon rank sum test

**Table S1b.** Subjects included in neuroanatomy analyses.

|                                                      | non-CUD     | CUD         | <i>p</i>             |
|------------------------------------------------------|-------------|-------------|----------------------|
| N                                                    | 107         | 45          |                      |
| Male, n (%)                                          | 51 (48%)    | 22 (49%)    | 1.000 <sup>3</sup>   |
| Age (range)                                          | 40 (19-70)  | 37 (19-69)  | 0.280 <sup>4</sup>   |
| Duration of CB use, mean (range in yrs) <sup>1</sup> | -           | 10 (1-35)   |                      |
| Education, median (range)                            | 4 (2-8)     | 3 (2-6)     | 0.002 <sup>5</sup>   |
| On social disability, n (%)                          | 11 (10.3%)  | 2 (4.4%)    | 0.347 <sup>3</sup>   |
| Axis I Psychiatric Diagnoses, n (%)                  |             |             |                      |
| No diagnosis                                         | 66 (61.68%) | -           |                      |
| Depression                                           | 10 (9.35%)  | 7 (15.56%)  | 0.395 <sup>3</sup>   |
| PTSD                                                 | 9 (8.41%)   | 2 (4.44%)   | 0.610 <sup>3</sup>   |
| Anxiety disorders                                    | 5 (4.67%)   | 3 (6.67%)   | 0.758 <sup>3</sup>   |
| ADHD                                                 | 0 (0%)      | 1 (2.22%)   | 0.395 <sup>3</sup>   |
| Alcohol abuse/dependence                             | 23 (21.50%) | 16 (35.56%) | 0.246 <sup>3</sup>   |
| Drug other than CB abuse/dependence                  | 11 (10.28%) | 16 (35.56%) | 0.280 <sup>3</sup>   |
| Medication, n (%) <sup>2</sup>                       |             |             |                      |
| Anxiolytic                                           | 2 (1.83%)   | 0 (0)       | 1 <sup>3</sup>       |
| Antidepressant                                       | 3 (2.75%)   | 2 (4.44%)   | 0.633 <sup>3</sup>   |
| Atypical antipsychotic <sup>2</sup>                  | 2 (1.83%)   | 0 (0)       | 1 <sup>3</sup>       |
| Anticonvulsant <sup>2</sup>                          | 2 (1.83%)   | 0 (0)       | 1 <sup>3</sup>       |
| Alcohol & Nicotine                                   |             |             |                      |
| Nr drinks per month, mean (sd)                       | 8 (18)      | 13 (16)     | 0.002 <sup>4</sup>   |
| Currently smoking, n (%)                             | 31 (28.97)  | 32 (71.11)  | < 0.001 <sup>3</sup> |
| FTND, median (range) <sup>1</sup>                    | 0 (0-9)     | 3 (0-9)     | 0.009 <sup>5</sup>   |

Diagnoses are lifetime diagnoses. CB= cannabis; FTND= Fagerström test for nicotine dependence (ranges from 0 to 12).

Bold: significant difference ( $p < 0.05$ )

<sup>1</sup> missing data for cannabis duration (1); FTND (24, equal percentage in the non-CUD & CUD group),

<sup>2</sup> None of the participants used mood stabilizers or lithium. Atypical antipsychotic medication was used for treatment of MDD; Anticonvulsant was used for nerve pain.

<sup>3</sup> Fisher's exact test

<sup>4</sup> Welch's *t* test

<sup>5</sup> Wilcoxon rank sum test



**Table S1c.** Subjects included in diffusion imaging analyses.

|                                         | non-CUD     | CUD         | <i>p</i>             |
|-----------------------------------------|-------------|-------------|----------------------|
| N                                       | 110         | 42          |                      |
| Male, n (%)                             | 50 (45%)    | 21 (50%)    | 0.547 <sup>3</sup>   |
| Age (range)                             | 40 (19-69)  | 38 (19-69)  | 0.717 <sup>4</sup>   |
| Duration of CB use, mean (range in yrs) | -           | 11 (1-35)   |                      |
| Education, median (range)               | 4 (2-8)     | 3 (2-6)     | <0.001 <sup>5</sup>  |
| On social disability, n (%)             | 9 (8.2%)    | 2 (4.8%)    | 0.728 <sup>3</sup>   |
| Axis I Psychiatric Diagnoses, n (%)     |             |             |                      |
| No diagnosis                            | 70 (63.64%) | -           |                      |
| Depression                              | 9 (8.18%)   | 7 (16.67%)  | 0.145 <sup>3</sup>   |
| PTSD                                    | 9 (8.18%)   | 2 (4.76%)   | 0.728 <sup>3</sup>   |
| Anxiety disorders                       | 5 (4.55%)   | 4 (9.52%)   | 0.262 <sup>3</sup>   |
| ADHD                                    | 0 (0%)      | 1 (2.38%)   | 0.276 <sup>3</sup>   |
| Alcohol abuse/dependence                | 26 (23.64%) | 14 (33.33%) | 0.225 <sup>3</sup>   |
| Drug other than CB abuse/dependence     | 10 (9.09%)  | 16 (38.1%)  | 0.146 <sup>3</sup>   |
| Medication, n (%) <sup>1</sup>          |             |             |                      |
| Anxiolytic                              | 1 (0.90%)   | 0 (0%)      | 1 <sup>3</sup>       |
| Antidepressant                          | 3 (2.70%)   | 2 (4.76%)   | 0.617 <sup>3</sup>   |
| Atypical antipsychotic <sup>1</sup>     | 2 (1.80%)   | 0 (0%)      | 1 <sup>3</sup>       |
| Anticonvulsant <sup>1</sup>             | 2 (1.80%)   | 0 (0%)      | 1 <sup>3</sup>       |
| Alcohol & Nicotine                      |             |             |                      |
| Nr drinks per month, mean (sd)          | 8 (18)      | 14 (17)     | 0.002 <sup>4</sup>   |
| Currently smoking, n (%)                | 30 (27.27)  | 29 (69.05)  | < 0.001 <sup>3</sup> |
| FTND, median (range) <sup>2</sup>       | 0 (0-9)     | 3 (0-9)     | 0.008 <sup>5</sup>   |

Diagnoses are lifetime diagnoses. CB= cannabis; FTND= Fagerström test for nicotine dependence (ranges from 0 to 12).

Bold: significant difference ( $p < 0.05$ )

<sup>1</sup> None of the participants used mood stabilizers or lithium. Atypical antipsychotic medication was used for treatment of MDD; Anticonvulsant was used for nerve pain.

<sup>2</sup> missing data for FTND (n=24, equal percentage in the non-CUD & CUD group)

<sup>3</sup> Fisher's exact test

<sup>4</sup> Welch's *t* test

<sup>5</sup> Wilcoxon rank sum test

**Table S1d.** Subjects included in resting state analyses.

|                                         | non-CUD     | CUD         | <i>p</i>             |
|-----------------------------------------|-------------|-------------|----------------------|
| N                                       | 92          | 39          |                      |
| Male, n (%)                             | 43 (47%)    | 19 (49%)    | 0.851 <sup>3</sup>   |
| Age (range)                             | 39 (19-70)  | 34 (19-60)  | 0.096 <sup>4</sup>   |
| Duration of CB use, mean (range in yrs) | -           | 11 (1-35)   |                      |
| Education, median (range)               | 4 (2-8)     | 3 (2-6)     | <0.001 <sup>5</sup>  |
| On social disability, n (%)             | 8 (8.7%)    | 1 (2.6%)    | 0.279 <sup>3</sup>   |
| Axis I Psychiatric Diagnoses, n (%)     |             |             |                      |
| No diagnosis                            | 56 (60.87%) | -           |                      |
| Depression                              | 9 (9.78%)   | 4 (10.26%)  | 1.000 <sup>3</sup>   |
| PTSD                                    | 9 (9.78%)   | 2 (5.13%)   | 0.505 <sup>3</sup>   |
| Anxiety disorders                       | 5 (5.43%)   | 3 (7.69%)   | 0.695 <sup>3</sup>   |
| ADHD                                    | 0 (0%)      | 1 (2.56%)   | 0.298 <sup>3</sup>   |
| Alcohol abuse/dependence                | 21 (22.83%) | 12 (30.77%) | 0.381 <sup>3</sup>   |
| Drug other than CB abuse/dependence     | 8 (8.70%)   | 14 (35.9%)  | 0.436 <sup>3</sup>   |
| Medication, n (%) <sup>1</sup>          |             |             |                      |
| Anxiolytic                              | 2 (2.13%)   | 0 (0%)      | 1 <sup>3</sup>       |
| Antidepressant                          | 2 (2.13%)   | 2 (5.13%)   | 0.285 <sup>3</sup>   |
| Atypical antipsychotic <sup>1</sup>     | 2 (2.13%)   | 0 (0%)      | 1 <sup>3</sup>       |
| Anticonvulsant <sup>1</sup>             | 1 (1.06%)   | 0 (0%)      | 1 <sup>3</sup>       |
| Alcohol & Nicotine                      |             |             |                      |
| Nr drinks per month, mean (sd)          | 9 (19)      | 11 (15)     | 0.006 <sup>4</sup>   |
| Currently smoking, n (%)                | 26 (28.26)  | 28 (71.79)  | < 0.001 <sup>3</sup> |
| FTND, median (range) <sup>2</sup>       | 0 (0-9)     | 3 (0-9)     | 0.002 <sup>5</sup>   |

Diagnoses are lifetime diagnoses. CB= cannabis; FTND= Fagerström test for nicotine dependence (ranges from 0 to 12).

Bold: significant difference ( $p < 0.05$ )

<sup>1</sup> None of the participants used mood stabilizers or lithium. Atypical antipsychotic medication was used for treatment of MDD; Anticonvulsant was used for nerve pain.

<sup>2</sup> missing data for FTND (24, equal percentage in the non-CUD & CUD group)

<sup>3</sup> Fisher's exact test

<sup>4</sup> Welch's *t* test

<sup>5</sup> Wilcoxon rank sum test

Associations of cannabis use disorder with cognition, brain structure, and brain function

**Table S2.** Regional cortical thickness (mean (SD)).

| lobe         | Region (thickness)       | Left        |             |                  |          |             | Right       |             |                  |          |      |
|--------------|--------------------------|-------------|-------------|------------------|----------|-------------|-------------|-------------|------------------|----------|------|
|              |                          | non-CUD     | CUD         | Cohen's <i>d</i> | <i>p</i> | BF          | non-CUD     | CUD         | Cohen's <i>d</i> | <i>p</i> | BF   |
| frontal      | caudalmiddlefrontal      | 2.67 (0.20) | 2.70 (0.23) | -0.06            | 0.76     | 0.13        | 2.69 (0.19) | 2.67 (0.20) | -0.35            | 0.06     | 0.91 |
|              | frontalpole              | 2.81 (0.31) | 2.94 (0.36) | 0.33             | 0.09     | 0.80        | 2.83 (0.31) | 2.83 (0.32) | -0.16            | 0.41     | 0.21 |
|              | lateralorbitofrontal     | 2.71 (0.22) | 2.73 (0.17) | -0.08            | 0.62     | 0.14        | 2.70 (0.24) | 2.75 (0.19) | 0.10             | 0.55     | 0.15 |
|              | medialorbitofrontal      | 2.55 (0.22) | 2.54 (0.23) | -0.18            | 0.35     | 0.23        | 2.72 (0.21) | 2.72 (0.20) | -0.13            | 0.50     | 0.17 |
|              | paracentral              | 2.46 (0.16) | 2.48 (0.16) | -0.05            | 0.79     | 0.13        | 2.48 (0.18) | 2.51 (0.19) | 0.05             | 0.79     | 0.13 |
|              | parsopercularis          | 2.72 (0.23) | 2.75 (0.21) | -0.09            | 0.61     | 0.14        | 2.77 (0.21) | 2.83 (0.18) | 0.17             | 0.32     | 0.22 |
|              | parsorbitalis            | 2.74 (0.30) | 2.81 (0.23) | 0.15             | 0.37     | 0.19        | 2.78 (0.29) | 2.85 (0.22) | 0.15             | 0.37     | 0.19 |
|              | parstriangularis         | 2.57 (0.21) | 2.63 (0.21) | 0.16             | 0.39     | 0.21        | 2.63 (0.23) | 2.69 (0.19) | 0.12             | 0.47     | 0.17 |
|              | precentral               | 2.63 (0.21) | 2.64 (0.21) | -0.08            | 0.64     | 0.14        | 2.62 (0.22) | 2.63 (0.24) | -0.12            | 0.53     | 0.16 |
|              | rostralmiddlefrontal     | 2.52 (0.19) | 2.54 (0.19) | -0.12            | 0.51     | 0.16        | 2.54 (0.19) | 2.58 (0.18) | 0.08             | 0.66     | 0.14 |
| medial temp  | superiorfrontal          | 2.80 (0.20) | 2.82 (0.24) | -0.06            | 0.76     | 0.13        | 2.81 (0.21) | 2.83 (0.21) | -0.09            | 0.62     | 0.15 |
|              | entorhinal               | 3.01 (0.35) | 3.01 (0.30) | -0.07            | 0.70     | 0.13        | 3.13 (0.34) | 3.17 (0.35) | 0.07             | 0.72     | 0.13 |
|              | fusiform                 | 2.75 (0.16) | 2.77 (0.14) | -0.01            | 0.93     | 0.12        | 2.77 (0.16) | 2.80 (0.14) | 0.04             | 0.81     | 0.13 |
|              | parahippocampal          | 2.56 (0.30) | 2.57 (0.26) | -0.08            | 0.67     | 0.14        | 2.53 (0.28) | 2.57 (0.23) | 0.08             | 0.67     | 0.14 |
| lateral temp | temporalpole             | 3.20 (0.44) | 3.23 (0.35) | 0.02             | 0.90     | 0.12        | 3.32 (0.43) | 3.38 (0.36) | 0.10             | 0.54     | 0.15 |
|              | bankssts                 | 2.59 (0.18) | 2.64 (0.15) | 0.15             | 0.37     | 0.19        | 2.71 (0.21) | 2.79 (0.18) | 0.31             | 0.07     | 0.66 |
|              | inferiortemporal         | 2.85 (0.20) | 2.86 (0.17) | -0.09            | 0.61     | 0.14        | 2.88 (0.21) | 2.89 (0.15) | -0.02            | 0.89     | 0.12 |
|              | middletemporal           | 2.89 (0.23) | 2.93 (0.18) | 0.05             | 0.75     | 0.13        | 2.96 (0.21) | 3.01 (0.16) | 0.16             | 0.31     | 0.21 |
|              | superiortemporal         | 2.79 (0.23) | 2.83 (0.18) | 0.05             | 0.75     | 0.13        | 2.85 (0.22) | 2.89 (0.17) | 0.05             | 0.76     | 0.13 |
| parietal     | transversetemporal       | 2.53 (0.22) | 2.53 (0.23) | -0.10            | 0.58     | 0.15        | 2.56 (0.28) | 2.55 (0.20) | -0.19            | 0.24     | 0.25 |
|              | inferiorparietal         | 2.54 (0.15) | 2.57 (0.15) | 0.11             | 0.51     | 0.16        | 2.56 (0.17) | 2.59 (0.17) | 0.04             | 0.83     | 0.13 |
|              | postcentral              | 2.13 (0.14) | 2.14 (0.12) | 0.00             | 0.98     | 0.12        | 2.16 (0.15) | 2.17 (0.14) | -0.08            | 0.66     | 0.14 |
|              | precuneus                | 2.46 (0.15) | 2.48 (0.14) | 0.01             | 0.96     | 0.12        | 2.48 (0.14) | 2.53 (0.14) | 0.28             | 0.14     | 0.48 |
|              | superiorparietal         | 2.24 (0.11) | 2.27 (0.13) | 0.10             | 0.59     | 0.15        | 2.25 (0.14) | 2.28 (0.14) | 0.10             | 0.58     | 0.15 |
| occipital    | supramarginal            | 2.59 (0.18) | 2.62 (0.16) | 0.03             | 0.88     | 0.12        | 2.61 (0.18) | 2.65 (0.15) | 0.08             | 0.65     | 0.14 |
|              | cuneus                   | 1.92 (0.12) | 1.94 (0.13) | 0.07             | 0.69     | 0.13        | 1.92 (0.14) | 1.97 (0.15) | 0.25             | 0.18     | 0.38 |
|              | lateraloccipital         | 2.15 (0.12) | 2.15 (0.13) | -0.07            | 0.71     | 0.13        | 2.20 (0.14) | 2.18 (0.17) | -0.23            | 0.22     | 0.35 |
|              | lingual                  | 2.01 (0.12) | 2.03 (0.13) | -0.01            | 0.98     | 0.12        | 2.04 (0.13) | 2.06 (0.11) | 0.05             | 0.77     | 0.13 |
| cingulate    | pericalcarine            | 1.83 (0.15) | 1.84 (0.13) | 0.06             | 0.71     | 0.13        | 1.82 (0.15) | 1.82 (0.16) | -0.02            | 0.90     | 0.12 |
|              | caudalanteriorcingulate  | 2.62 (0.27) | 2.65 (0.23) | -0.02            | 0.92     | 0.12        | 2.47 (0.30) | 2.55 (0.21) | 0.20             | 0.18     | 0.27 |
|              | isthmuscingulate         | 2.25 (0.36) | 2.28 (0.34) | 0.04             | 0.82     | 0.13        | 2.30 (0.21) | 2.35 (0.18) | 0.23             | 0.17     | 0.33 |
|              | posteriorcingulate       | 2.54 (0.19) | 2.56 (0.18) | -0.07            | 0.70     | 0.13        | 2.51 (0.20) | 2.58 (0.15) | 0.27             | 0.09     | 0.46 |
| Insula       | rostralanteriorcingulate | 2.94 (0.32) | 2.98 (0.24) | 0.00             | 1.00     | 0.12        | 2.91 (0.31) | 2.94 (0.25) | -0.02            | 0.90     | 0.12 |
| insula       | 2.94 (0.23)              | 2.95 (0.16) | -0.08       | 0.62             | 0.14     | 2.96 (0.23) | 2.99 (0.21) | -0.01       | 0.93             | 0.12     |      |

BF = Bayes Factor; Raw values are reported, statistics were done on normalized residuals

Associations of cannabis use disorder with cognition, brain structure, and brain function

**Table S3.** Regional cortical surface area and subcortical volumes (mean (SD)).

| lobe         | Region (area/volume)     | Left       |            |                  |          |      | Right      |            |                  |          |      |
|--------------|--------------------------|------------|------------|------------------|----------|------|------------|------------|------------------|----------|------|
|              |                          | non-CUD    | CUD        | Cohen's <i>d</i> | <i>p</i> | BF   | non-CUD    | CUD        | Cohen's <i>d</i> | <i>p</i> | BF   |
| frontal      | caudalmiddlefrontal      | 2177 (397) | 2117 (383) | -0.21            | 0.24     | 0.29 | 1998 (423) | 1937 (362) | -0.22            | 0.18     | 0.31 |
|              | frontalpole              | 197 (39)   | 187 (33)   | -0.35            | 0.04     | 0.89 | 270 (54)   | 263 (46)   | -0.15            | 0.39     | 0.19 |
|              | lateralorbitofrontal     | 2366 (286) | 2351 (322) | -0.12            | 0.51     | 0.17 | 2358 (280) | 2367 (309) | -0.05            | 0.78     | 0.13 |
|              | medialorbitofrontal      | 1777 (296) | 1755 (307) | -0.08            | 0.65     | 0.14 | 1652 (209) | 1642 (238) | -0.10            | 0.58     | 0.15 |
|              | paracentral              | 1264 (179) | 1263 (209) | -0.04            | 0.84     | 0.13 | 1449 (209) | 1426 (200) | -0.15            | 0.38     | 0.20 |
|              | parsopercularis          | 1522 (243) | 1534 (245) | 0.01             | 0.96     | 0.12 | 1296 (207) | 1253 (220) | -0.24            | 0.19     | 0.37 |
|              | parsorbitalis            | 597 (88)   | 586 (94)   | -0.18            | 0.33     | 0.23 | 744 (112)  | 735 (105)  | -0.14            | 0.39     | 0.18 |
|              | parstriangularis         | 1264 (193) | 1234 (175) | -0.23            | 0.17     | 0.33 | 1507 (243) | 1432 (235) | -0.40            | 0.03     | 1.54 |
|              | precentral               | 4547 (534) | 4537 (564) | -0.03            | 0.87     | 0.12 | 4658 (566) | 4687 (595) | 0.02             | 0.92     | 0.12 |
|              | rostralmiddlefrontal     | 5640 (784) | 5624 (737) | -0.10            | 0.58     | 0.15 | 5894 (874) | 5882 (777) | -0.10            | 0.53     | 0.15 |
|              | superiorfrontal          | 6760 (758) | 6796 (816) | -0.02            | 0.93     | 0.12 | 6533 (804) | 6637 (744) | 0.09             | 0.59     | 0.15 |
| medial temp  | entorhinal               | 383 (69)   | 386 (88)   | 0.07             | 0.71     | 0.14 | 338 (69)   | 332 (68)   | -0.05            | 0.77     | 0.13 |
|              | fusiform                 | 3155 (413) | 3193 (363) | 0.05             | 0.76     | 0.13 | 3055 (420) | 3083 (394) | 0.03             | 0.87     | 0.12 |
|              | parahippocampal          | 686 (93)   | 723 (100)  | 0.34             | 0.06     | 0.87 | 675 (92)   | 678 (86)   | -0.03            | 0.86     | 0.12 |
|              | temporalpole             | 481 (62)   | 478 (61)   | -0.06            | 0.72     | 0.13 | 435 (62)   | 441 (69)   | 0.10             | 0.61     | 0.15 |
| lateral temp | bankssts                 | 1052 (180) | 1045 (138) | -0.15            | 0.32     | 0.20 | 952 (157)  | 949 (170)  | -0.10            | 0.60     | 0.15 |
|              | inferiortemporal         | 2990 (449) | 3053 (461) | 0.05             | 0.75     | 0.13 | 2872 (503) | 2886 (456) | -0.05            | 0.77     | 0.13 |
|              | middletemporal           | 2876 (409) | 2887 (461) | -0.06            | 0.73     | 0.13 | 3121 (425) | 3147 (484) | -0.02            | 0.90     | 0.12 |
|              | superiortemporal         | 3660 (419) | 3728 (473) | 0.11             | 0.55     | 0.16 | 3489 (387) | 3511 (406) | -0.03            | 0.88     | 0.12 |
| parietal     | transversetemporal       | 445 (72)   | 446 (75)   | -0.01            | 0.96     | 0.12 | 324 (55)   | 327 (60)   | 0.03             | 0.88     | 0.12 |
|              | inferiorparietal         | 4499 (626) | 4499 (618) | -0.09            | 0.62     | 0.14 | 5362 (770) | 5372 (874) | -0.07            | 0.70     | 0.14 |
|              | postcentral              | 3906 (534) | 4013 (498) | 0.19             | 0.27     | 0.24 | 3766 (542) | 3771 (520) | 0.00             | 0.99     | 0.12 |
|              | precuneus                | 3464 (405) | 3495 (466) | 0.03             | 0.87     | 0.12 | 3675 (489) | 3632 (475) | -0.14            | 0.41     | 0.18 |
|              | superiorparietal         | 5037 (542) | 4993 (599) | -0.15            | 0.41     | 0.19 | 5020 (552) | 4991 (681) | -0.07            | 0.70     | 0.14 |
| occipital    | supramarginal            | 3497 (511) | 3678 (589) | 0.30             | 0.13     | 0.58 | 3437 (529) | 3544 (528) | 0.16             | 0.38     | 0.20 |
|              | cuneus                   | 1371 (233) | 1332 (195) | -0.24            | 0.14     | 0.35 | 1405 (227) | 1358 (247) | -0.23            | 0.20     | 0.32 |
|              | lateraloccipital         | 4540 (552) | 4490 (559) | -0.17            | 0.34     | 0.21 | 4346 (620) | 4513 (599) | 0.25             | 0.16     | 0.37 |
|              | lingual                  | 2871 (405) | 2873 (399) | -0.01            | 0.94     | 0.12 | 2903 (399) | 2889 (422) | -0.07            | 0.69     | 0.14 |
|              | pericalcarine            | 1370 (260) | 1368 (218) | -0.03            | 0.84     | 0.12 | 1486 (287) | 1447 (320) | -0.17            | 0.35     | 0.22 |
| cingulate    | caudalanteriorcingulate  | 624 (142)  | 601 (117)  | -0.24            | 0.14     | 0.37 | 750 (180)  | 728 (121)  | -0.16            | 0.31     | 0.20 |
|              | isthmuscingulate         | 1023 (359) | 991 (307)  | -0.12            | 0.46     | 0.16 | 892 (146)  | 884 (154)  | -0.11            | 0.54     | 0.16 |
|              | posteriorcingulate       | 1114 (172) | 1109 (145) | -0.07            | 0.67     | 0.14 | 1140 (180) | 1114 (174) | -0.22            | 0.19     | 0.32 |
|              | rostralanteriorcingulate | 748 (155)  | 775 (177)  | 0.14             | 0.45     | 0.18 | 597 (134)  | 624 (130)  | 0.22             | 0.21     | 0.30 |

Associations of cannabis use disorder with cognition, brain structure, and brain function

|             |             |              |              |       |      |      |              |              |       |      |      |
|-------------|-------------|--------------|--------------|-------|------|------|--------------|--------------|-------|------|------|
| insula      | insula      | 2227 (256)   | 2233 (256)   | 0.00  | 0.99 | 0.12 | 2318 (286)   | 2325 (310)   | 0.03  | 0.86 | 0.12 |
| subcortical | accumbens   | 538 (130)    | 578 (127)    | 0.18  | 0.30 | 0.24 | 550 (123)    | 607 (133)    | 0.37  | 0.04 | 1.18 |
|             | amygdala    | 1465 (236)   | 1509 (206)   | 0.10  | 0.53 | 0.15 | 1585 (248)   | 1570 (196)   | -0.15 | 0.37 | 0.19 |
|             | caudate     | 3368 (540)   | 3372 (393)   | -0.07 | 0.66 | 0.14 | 3518 (549)   | 3534 (444)   | -0.05 | 0.77 | 0.13 |
|             | hippocampus | 4249 (570)   | 4266 (476)   | -0.09 | 0.56 | 0.15 | 4277 (504)   | 4215 (491)   | -0.30 | 0.08 | 0.61 |
|             | pallidum    | 1282 (245)   | 1318 (258)   | 0.01  | 0.94 | 0.12 | 1394 (220)   | 1437 (205)   | 0.11  | 0.53 | 0.15 |
|             | putamen     | 5065 (869)   | 5152 (892)   | -0.10 | 0.57 | 0.15 | 5010 (840)   | 5139 (771)   | -0.02 | 0.91 | 0.12 |
|             | thalamus    | 7868 (1136)  | 7863 (945)   | -0.08 | 0.65 | 0.14 | 6841 (955)   | 6860 (842)   | -0.09 | 0.61 | 0.14 |
| cerebellum  | cerebellum  | 52945 (5681) | 53047 (7516) | -0.09 | 0.66 | 0.14 | 54462 (6342) | 54358 (7375) | -0.14 | 0.46 | 0.18 |

BF= Bayes Factor; Raw values are reported, statistics were done on normalized residuals

**Table S4.** Mean (SD) FA of the skeleton and of JHU white matter tracts.

|                | non-CUD       | CUD           | Cohen's <i>d</i> | <i>p</i>                      | BF   |
|----------------|---------------|---------------|------------------|-------------------------------|------|
| Whole skeleton | 0.484 (0.015) | 0.479 (0.015) | -0.34            | 0.057                         | 0.86 |
| L_ATR          | 0.498 (0.018) | 0.492 (0.014) | -0.37            | <u>0.026</u> <sup>1,2</sup>   | 1.07 |
| R_ATR          | 0.495 (0.017) | 0.487 (0.015) | -0.44            | <u>0.014</u> <sup>2</sup>     | 2.19 |
| L_CC           | 0.630 (0.025) | 0.622 (0.024) | -0.34            | 0.060                         | 0.80 |
| R_CC           | 0.597 (0.028) | 0.587 (0.026) | -0.34            | 0.054                         | 0.84 |
| L_CH           | 0.480 (0.030) | 0.476 (0.032) | -0.14            | 0.455                         | 0.19 |
| R_CH           | 0.520 (0.030) | 0.514 (0.032) | -0.20            | 0.292                         | 0.26 |
| L_CST          | 0.620 (0.018) | 0.617 (0.021) | -0.13            | 0.505                         | 0.18 |
| R_CST          | 0.616 (0.018) | 0.613 (0.020) | -0.14            | 0.467                         | 0.18 |
| Fmaj           | 0.592 (0.020) | 0.584 (0.016) | -0.41            | <u>0.014</u> <sup>1,2</sup>   | 1.65 |
| Fmin           | 0.556 (0.021) | 0.552 (0.019) | -0.21            | 0.213                         | 0.29 |
| L_IFOF         | 0.527 (0.022) | 0.519 (0.021) | -0.40            | <u>0.025</u> <sup>1,2</sup>   | 1.53 |
| R_IFOF         | 0.534 (0.020) | 0.527 (0.018) | -0.32            | 0.059                         | 0.71 |
| L_ILF          | 0.507 (0.022) | 0.500 (0.021) | -0.34            | 0.056                         | 0.85 |
| R_ILF          | 0.513 (0.021) | 0.507 (0.020) | -0.28            | 0.114                         | 0.49 |
| L_SLF          | 0.505 (0.018) | 0.500 (0.019) | -0.31            | 0.102                         | 0.60 |
| R_SLF          | 0.517 (0.019) | 0.510 (0.020) | -0.37            | <u>0.049</u> <sup>1,2,3</sup> | 1.13 |
| L_SLF_temp     | 0.541 (0.020) | 0.535 (0.021) | -0.26            | 0.174                         | 0.40 |
| R_SLF_temp     | 0.544 (0.020) | 0.537 (0.023) | -0.35            | 0.068                         | 0.92 |
| L_UF           | 0.476 (0.021) | 0.470 (0.021) | -0.32            | 0.078                         | 0.71 |
| R_UF           | 0.477 (0.021) | 0.473 (0.020) | -0.21            | 0.239                         | 0.28 |

Underlined: *p* < 0.05, uncorrected

BF= Bayes Factor

ATR= Anterior Thalamic Radiation; CC= Cingulum Cortex; CH= Cingulum Hippocampus; CST= Corticospinal Tract; Fmaj= Forceps Major; FMin= Forceps Minor; IFOF= Inferior Fronto-Occipital Fasciculus; ILF= Inferior Longitudinal Fasciculus; SLF= Superior Longitudinal Fasciculus; SLF\_temp= Superior Longitudinal Fasciculus Temporal Portion; UF= Uncinate Fasciculus; R= right; L=left.

Results were the same when not correcting for motion.

<sup>1</sup> not significant after controlling for nicotine dependence (FNDS)

<sup>2</sup> not significant after controlling for education; remains significant after controlling for social disability status

<sup>3</sup> not significant after controlling for alcohol use (drinks/month); remains significant when controlling for current diagnosis of alcohol use disorder

**Table S5.** Marginally significant results in regional graph-theoretical metrics. Significance was set at  $p < 0.005$ , uncorrected.

| Metric              | rs Module | Region                 | hemisphere | Cohen's <i>d</i> | <i>p</i>                | BF* |
|---------------------|-----------|------------------------|------------|------------------|-------------------------|-----|
| Clustering (pos)    | SC        | Nucleus accumbens      | Left       | 0.60             | 0.0022 <sup>1,2</sup>   | 11  |
| Participation (neg) | DF        | Superior frontal gyrus | Left       | 0.62             | 0.0015                  | 15  |
| Participation (neg) | VA        | Insula                 | Left       | 0.55             | 0.0044 <sup>3,4</sup>   | 6.9 |
| Participation (pos) | N         | Middle Temporal Pole   | Right      | 0.55             | 0.0038 <sup>2,4,5</sup> | 8.0 |

BF= Bayes factor; FP= Fronto-Parietal; SC= subcortical; DF= Default mode; VA= ventral attention; N= None, regions in this module are noisy, results should be interpreted with caution.

\* See supplemental text on interpretation of  $BF > 3$  when doing multiple tests; this suggests that these BF provide strong evidence for the absence of a group difference.

<sup>1</sup> significant after correcting for nicotine dependence at  $p < 0.0101$

<sup>2</sup> significant after correcting for education at  $p < 0.0169$

<sup>3</sup> significant after correcting for alcoholic drinks/month or motion (DVARs) at  $p < 0.0067$

<sup>4</sup> significant after correcting for social disability status at  $p < 0.0077$

<sup>5</sup> significant after correcting for lifetime diagnosis of alcohol or substance use disorder other than cannabis, or motion (DVARs) at  $p < 0.0070$

**Table S6** – Marginally significant results in regional graph-theoretical metrics of non-GSR data. Significance was set at  $p < 0.005$ , uncorrected. Positive metrics were computed over densities 1-25%; negative metrics at 1-13% density.

| Metric           | rs Module | Region                  | hemisphere | Cohen's <i>d</i> | <i>p</i> | BF*  |
|------------------|-----------|-------------------------|------------|------------------|----------|------|
| Positive metrics |           |                         |            |                  |          |      |
| degree           | CO        | Insula                  | Left       | 0.59             | 0.0023   | 11.4 |
| degree           | DF        | Angular gyrus           | Right      | 0.57             | 0.0034   | 8.3  |
| degree           | VI        | Middle temporal gyrus   | Right      | 0.59             | 0.0024   | 10.8 |
| strength         | AU        | Insula                  | Left       | 0.57             | 0.0029   | 9.0  |
| strength         | CO        | Insula                  | Left       | 0.65             | 0.0008   | 24.6 |
| strength         | CO        | Insula                  | Left       | 0.62             | 0.0013   | 15.8 |
| strength         | DF        | Angular gyrus           | Right      | 0.60             | 0.0015   | 12.9 |
| strength         | DA        | Inferior parietal gyrus | Right      | 0.60             | 0.0016   | 12.5 |
| strength         | FP        | Inferior parietal gyrus | Right      | 0.69             | 0.0005   | 47.4 |
| strength         | VI        | Middle temporal gyrus   | Right      | 0.61             | 0.0014   | 15.0 |
| clustering       | CO        | Supplementary motor     | Right      | 0.56             | 0.0036   | 7.2  |
| clustering       | DF        | Precuneus               | Right      | 0.58             | 0.0028   | 9.3  |
| clustering       | RT        | Parahippocampal gyrus   | Right      | 0.53             | 0.0050   | 5.4  |
| clustering       | CB        | Vermis                  | -          | 0.55             | 0.0044   | 6.5  |
| participation    | DF        | Superior frontal gyrus  | Left       | 0.57             | 0.0036   | 8.4  |
| participation    | SA        | Inferior frontal gyrus  | Right      | 0.69             | 0.0004   | 42.1 |
| Efficiency       | -         | Whole brain             | -          | 0.42             | 0.0299   | 1.5  |
| Negative metrics |           |                         |            |                  |          |      |
| degree           | CO        | Supplementary motor     | Right      | 0.57             | 0.0029   | 8.4  |
| degree           | N         | Rectus                  | Right      | 0.60             | 0.0007   | 13.0 |
| degree           | N         | Rectus                  | Right      | 0.59             | 0.0014   | 10.8 |
| degree           | VA        | Insula                  | Left       | -0.64            | 0.0010   | 22.7 |
| strength         | N         | Rectus                  | Right      | 0.62             | 0.0014   | 16.2 |
| strength         | N         | Rectus                  | Right      | 0.68             | 0.0004   | 40.9 |
| strength         | VA        | Insula                  | Left       | -0.70            | 0.0003   | 55.7 |
| clustering       | SC        | Thalamus                | Left       | 0.57             | 0.0031   | 8.1  |
| clustering       | SC        | Caudate                 | Right      | 0.54             | 0.0047   | 5.7  |
| participation    | DA        | Middle frontal gyrus    | Left       | 0.58             | 0.0027   | 9.9  |
| participation    | N         | Rectus                  | Right      | 0.60             | 0.0021   | 12.5 |
| participation    | RT        | Parahippocampal gyrus   | Right      | 0.66             | 0.0005   | 42.0 |

BF= Bayes factor; CO= cingulo-operculum ; DF= Default mode; VI= visual; AU= auditory; DA= dorsal attention; FP= Fronto-Parietal; RT= retrosplenial-temporal; CB= cerebellum; SA= salience; VA= ventral attention; SC= subcortical; N= None, regions in this module are noisy, results should be interpreted with caution.

\* See supplemental text on interpretation of  $BF > 3$  when doing multiple tests. This suggests  $BF < 35$  provides substantial evidence for the absence of a group difference;  $BF > 35$  but  $< 300$  are inconclusive.



**Table S7** – Regional graph-theoretical metrics ( $p < 0.005$ ) of GSR processed data with same density as non-GSR results: positive metrics were computed over densities 1-25%; negative metrics at 1-13% density.

| Metric           | rs Module | Region                  | hemisphere | Cohen's <i>d</i> | <i>p</i> | BF*  |
|------------------|-----------|-------------------------|------------|------------------|----------|------|
| Positive metrics |           |                         |            |                  |          |      |
| clustering       | SC        | Nucleus Accumbens       | Left       | 0.62             | 0.0014   | 16.5 |
| participation    | N         | Temporal pole           | Right      | 0.59             | 0.0044   | 6.1  |
| Negative metrics |           |                         |            |                  |          |      |
| degree           | DF        | Superior temporal gyrus | Right      | 0.60             | 0.0017   | 12.0 |
| degree           | MM        | Postcentral gyrus       | Left       | -0.57            | 0.0036   | 8.7  |
| strength         | DF        | Superior temporal gyrus | Right      | 0.54             | 0.0045   | 5.8  |
| participation    | DF        | Superior frontal gyrus  | Left       | 0.56             | 0.0042   | 7.3  |
| participation    | N         | Fusiform gyrus          | Left       | 0.58             | 0.0028   | 9.7  |
| participation    | MH        | Postcentral gyrus       | Right      | 0.58             | 0.0023   | 9.8  |
| participation    | MH        | Postcentral gyrus       | Right      | 0.55             | 0.0041   | 6.9  |
| participation    | MH        | Postcentral gyrus       | Right      | 0.55             | 0.0048   | 6.3  |
| participation    | CB        | Lobe V                  | Left       | 0.54             | 0.0047   | 6.1  |
| participation    | CB        | Vermis, crus I          | -          | 0.63             | 0.0010   | 18.5 |
| participation    | CB        | Vermis, VIIIb           | -          | 0.59             | 0.0022   | 11.1 |

BF= Bayes factor; SC= subcortical; DF= Default mode; MM= motor mouth area; MH= motor hand area; CB= cerebellum; N= None, regions in this module are noisy, results should be interpreted with caution.

\* See supplemental text on interpretation of  $BF > 3$  when doing multiple tests. This suggests  $BF < 19$  provides substantial evidence for the absence of a group difference.

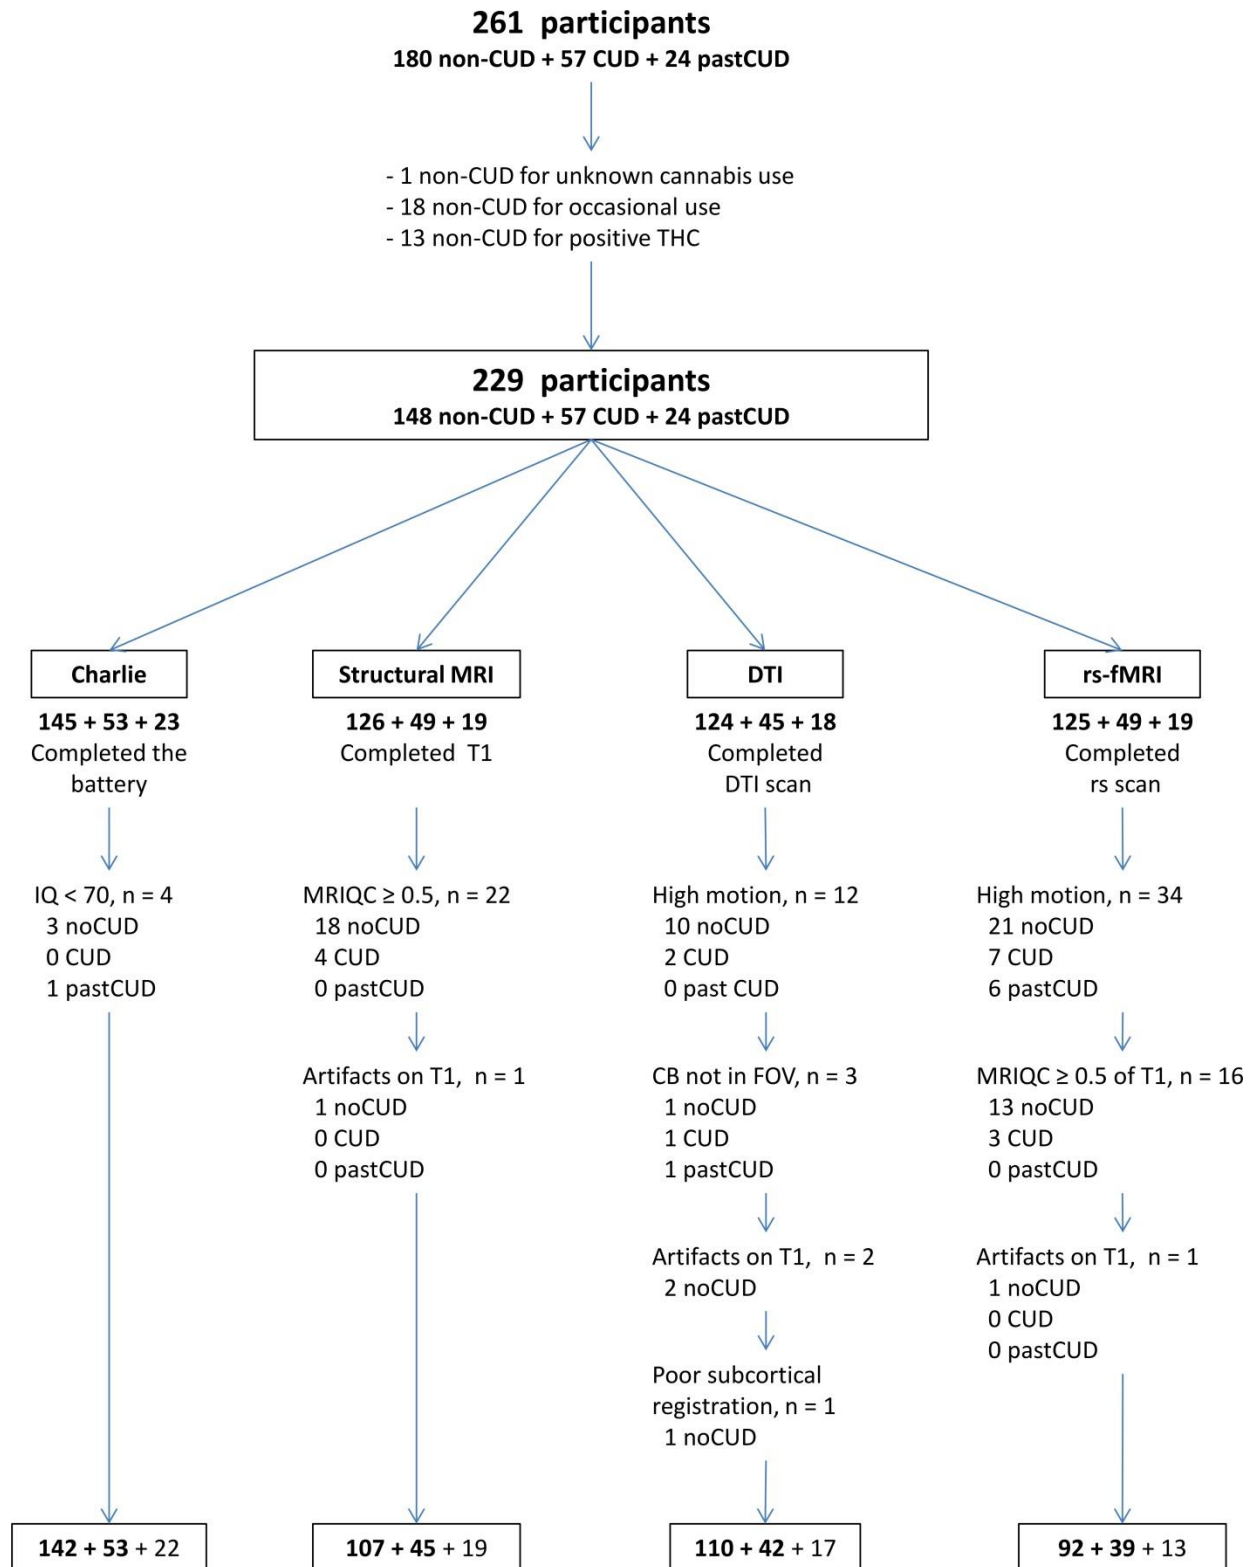

**Figure S1.** Overview of the number of participants per modality and reasons for exclusion. CB = cerebellum; rs = resting state.

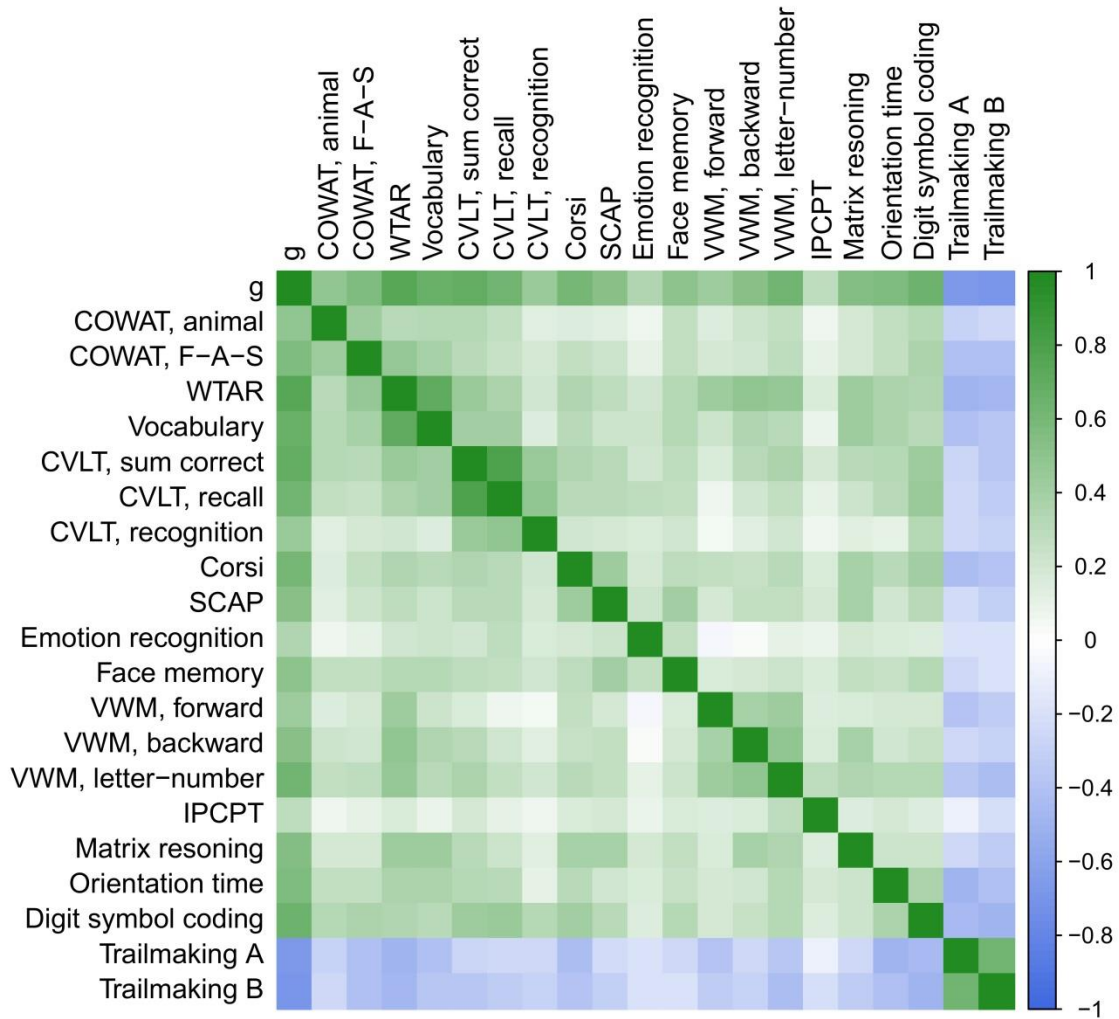

Figure S2. Correlations between all cognitive measures.

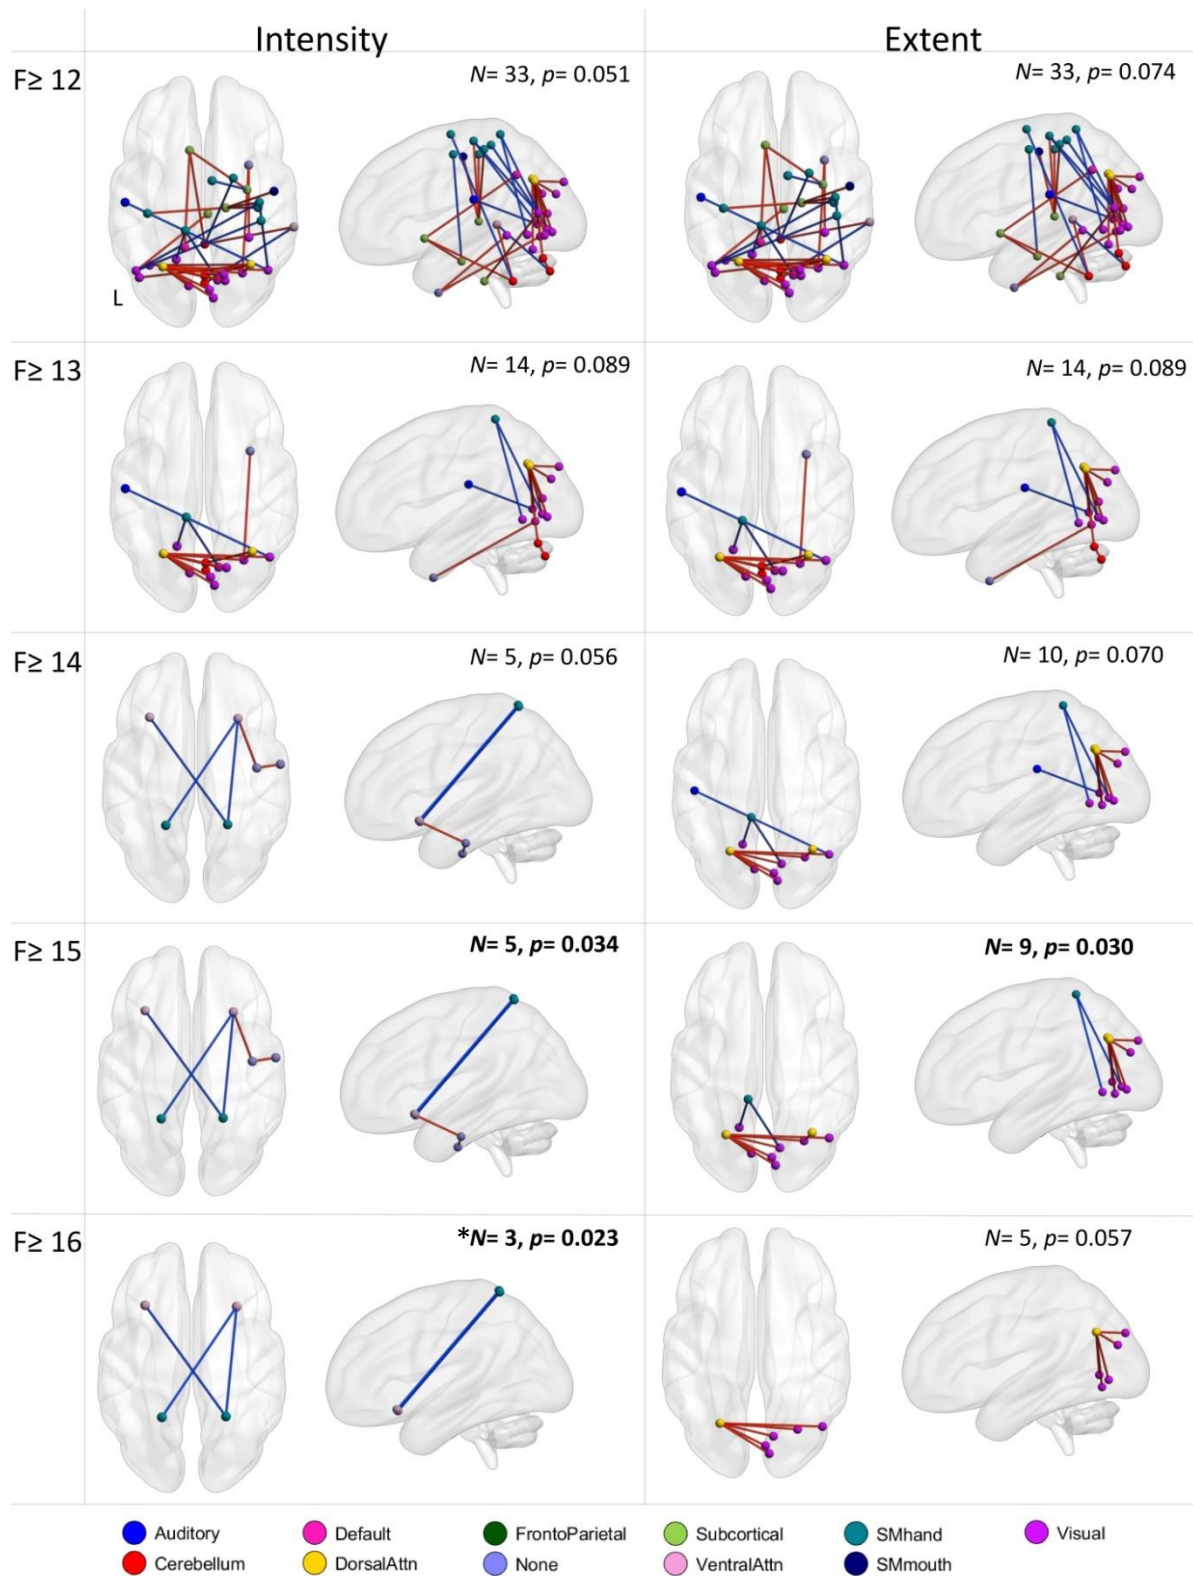

**Figure S3.** Output of all NBS networks over thresholds F $\geq$ 12 to F $\geq$ 16. \*For intensity F $\geq$ 17, the same network was found as for F $\geq$ 16 (*p*=0.018). Blue edges indicate weaker FC in CUD, red edges indicate stronger FC in CUD. *N*= number of edges; SM= somato-motor cortex. Figures were created with BrainNet Viewer (Xia et al., 2013).

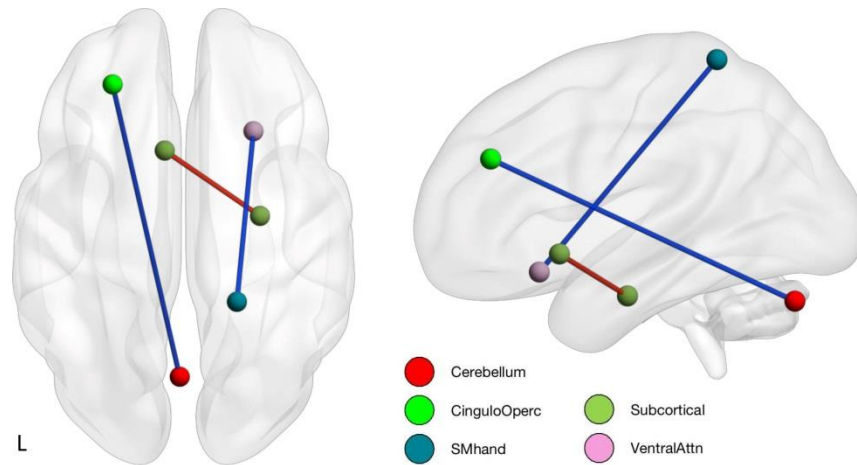

**Figure S4.** Three edges reached FDR significance: left middle frontal to vermis crus I; left nucleus accumbens to right hippocampus, right superior parietal gyrus to right insula. Note that for the FDR edges, the network is not thresholded in any way. Blue edges indicate weaker FC in CUD, red edges indicate stronger FC in CUD. SM= somato-motor cortex.

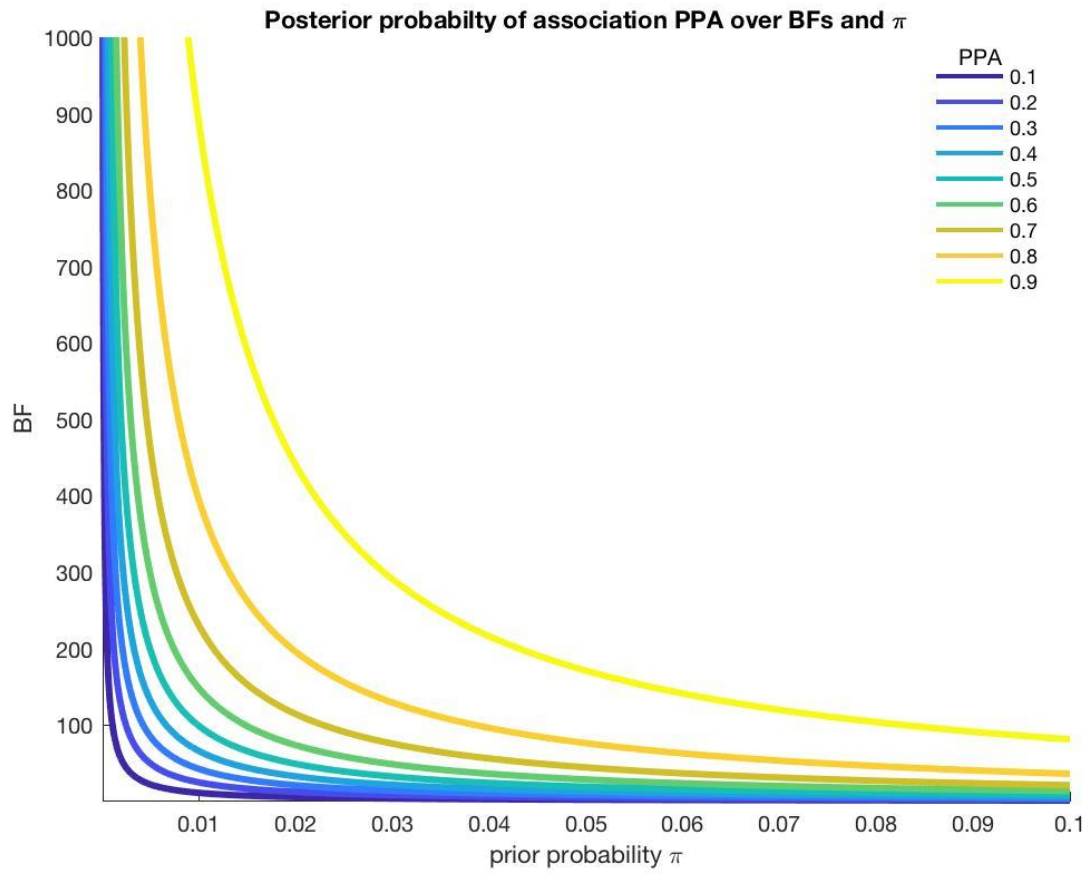

**Figure S5.** The relation between the prior probability  $\pi$ , the Bayes factor (BF) and the posterior probability of association PPA.
